# Supplementary material for: Association Between Tail-Biting and Intestinal Microbiota Composition in Pigs
Source: PubMed Central journal article supplement (PMC7756002; doi:10.3389/fvets.2020.563762), 2020-12-09
Supplement: Data_Sheet_1.pdf [file Data_Sheet_1.pdf]

## Supplementary Material

Figure S1. Schematic representation of animals and housing.

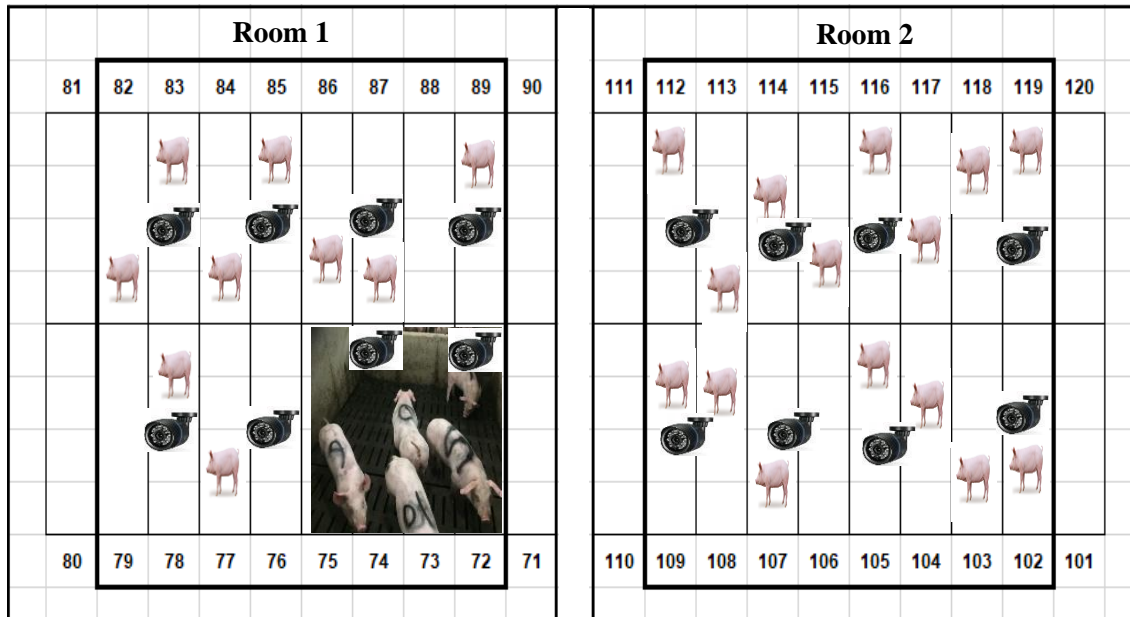

A total of 352 pigs were distributed into two rooms (1 and 2). Each room contained 16 growing-finishing pens ( $2.06 \text{ m} \times 3.35 \text{ m} = 6.9 \text{ m}^2$ ). The pens were made of a concrete slatted floor with concrete panels to prevent animal contacts across pens. No enrichment, beddings, straw, substrates, objects, toys, were provided. Each pen contained a pig hopper feeder and a waterer with a nipple. Eleven pigs (6 gilts and 5 barrows; density 1.6 pigs/m<sup>2</sup>) were present in each pen. To facilitate the recognition of the pig, a colored number from 0 to 10 was painted on the animal's back. This labeling was supplementary to the ear-tag system already in place at the farm. Their behavior was monitored using 16 surveillance cameras. The numbers 81 to 120 correspond to the pen number.

Biter pigs were from pens #72 (2 pigs), 76, 85, 86, 88, 103, 104, 105, 106, and 107 (2 pigs).

Bitten pigs were from pens #85, 86, 88, 103 (3 pigs), 104, 105 (2 pigs), 106, 107 (2 pigs).

Non-biter/non-bitten negative control pigs were from pens #82, 89 and 112.

Non-biter/non-bitten pigs treated with antibiotics (ATB), used as a control in DNA extraction, 16S rRNA gene amplification, sequencing and analysis, were from pens #84, 109, and 118.

|                                                                                   |                                                                                      |
|-----------------------------------------------------------------------------------|--------------------------------------------------------------------------------------|
|  | Pig                                                                                  |
|  | Video camera                                                                         |
|  | Magnified example of pigs with numbers on their backs to facilitate video-monitoring |

Figure S2. Pig tail-biting scores.

|                                                                                    |                                                                       |
|------------------------------------------------------------------------------------|-----------------------------------------------------------------------|
|   | <b>Score 0:</b><br>No tail damage (no lesion)                         |
|   | <b>Score 1:</b><br>Some scratches visible on the tail                 |
|   | <b>Score 2:</b><br>A small bleeding lesion on the tail                |
|  | <b>Score 3:</b><br>A major bleeding lesion,<br>including loss of tail |

Adapted from Institut du porc, Institut national de la recherche agronomique. Prévenir la douleur chez le porc. (2016). Available online at: <https://www.ifip.asso.fr/sites/default/files/pdf-documentations/dossier-prevention-douleur-porccaudectomie-caudophagie.pdf>.

**Figure S3. Non-metric multidimensional scaling (NMDS) Yue and Clayton index plot illustrating the comparison of intestinal microbiota of the ATB treated positive control group with the negative control pigs at t0 and t1.**

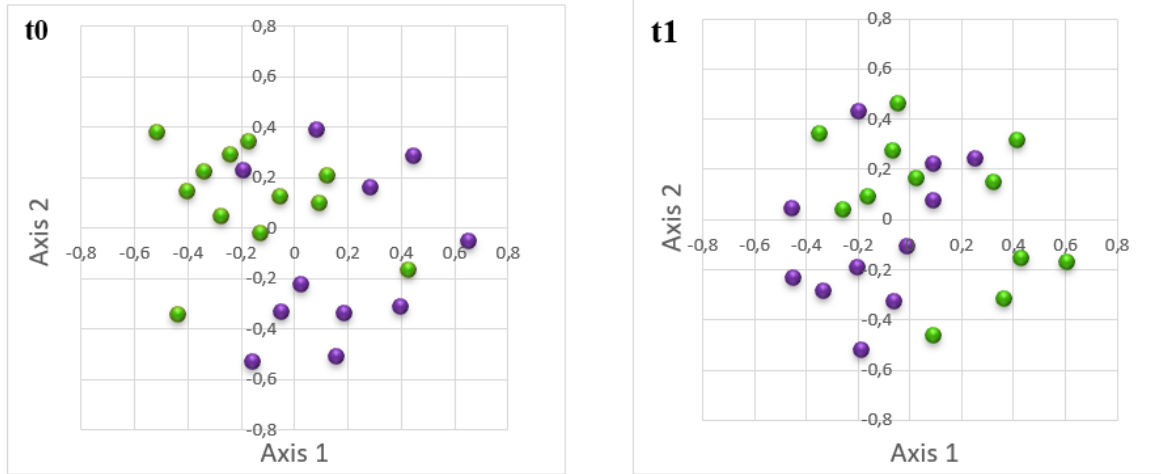

t0: time of the pig group formation; t1: four weeks after the pig group formation. Green: negative control pigs; purple: ATB-treated positive control group.

**Table S1. Genera and OTUs associated with the biter pig group compared to the negative control pig group at t0.**

| <b>GENERA</b>            | <b>Taxonomy</b>                                   | <b>Group</b> | <b>LDA</b> | <b>pValue</b> |
|--------------------------|---------------------------------------------------|--------------|------------|---------------|
| <i>Coprococcus</i>       | <i>B.F.C.Clostridiales.Lachnospiraceae</i>        | biter        | 3.30       | 0.0163        |
| <i>Clostridium_IV</i>    | <i>B.F.C.Clostridiales.Ruminococcaceae</i>        | biter        | 2.69       | 0.0312        |
| <i>Lactobacillus</i>     | <i>B.F.Bli.Lactles.Lactctobacillaeae</i>          | N. control   | 4.47       | 0.0031        |
| <i>Butyricicoccus</i>    | <i>B.F.C.Cles.Bacteroidales</i>                   | N. control   | 3.54       | 0.0363        |
| <i>Pseudobutyrvibrio</i> | <i>B.F.C.Cles..Lachnospiraceae</i>                | N. control   | 2.54       | 0.0163        |
|                          |                                                   |              |            |               |
| <b>OTUs</b>              | <b>Taxonomy</b>                                   | <b>Group</b> | <b>LDA</b> | <b>pValue</b> |
| Otu00020                 | <i>B.Btes.Bacteroidetes_ucl</i>                   | biter        | 4.03       | 0.0097        |
| Otu00069                 | <i>B.Firmicute_ucl</i>                            | biter        | 3.41       | 0.0007        |
| Otu00045                 | <i>B.F.C.Cles.Lachnoe.Coprococcus</i>             | biter        | 3.25       | 0.0163        |
| Otu00096                 | <i>B.Btes.Bdia.Bles.Prceae.Prevotella</i>         | biter        | 3.01       | 0.0476        |
| Otu01288                 | <i>B.F.C.Cles.Ruminoc.Faecalibacterium</i>        | biter        | 2.86       | 0.0404        |
| Otu00128                 | <i>B.F.C.Cles.Lachno.Blautia</i>                  | biter        | 2.79       | 0.0363        |
| Otu00027                 | <i>B.Btes.Btes_ucl</i>                            | biter        | 2.77       | 0.0116        |
| Otu00139                 | <i>B.Btes.Bdia.Bles.Prceae.Alloprevotella</i>     | biter        | 2.72       | 0.0363        |
| Otu00107                 | <i>B.Btes.Btes_ucl</i>                            | biter        | 2.70       | 0.0263        |
| Otu01045                 | <i>Clostridiales_ucl</i>                          | biter        | 2.66       | 0.0036        |
| Otu01146                 | <i>Clostridia_ucl</i>                             | biter        | 2.65       | 0.0404        |
| Otu01361                 | <i>B.Btes.Bdia.Bles.Prceae.Prevotella</i>         | biter        | 2.63       | 0.0414        |
| Otu00975                 | <i>Ruminococcaceae_ucl</i>                        | biter        | 2.61       | 0.0113        |
| Otu00797                 | <i>Clostridiales_ucl.</i>                         | biter        | 2.60       | 0.0404        |
| Otu01377                 | <i>B.Firmicutes_ucl</i>                           | biter        | 2.60       | 0.0404        |
| Otu01071                 | <i>Clostridiales_ucl</i>                          | biter        | 2.58       | 0.0299        |
| Otu01557                 | <i>Lachno_ucl</i>                                 | biter        | 2.54       | 0.0404        |
| Otu00169                 | <i>Clostridiales_ucl</i>                          | biter        | 2.54       | 0.0011        |
| Otu00152                 | <i>B.Btes.Bdia.Bles.Prceae.Prevotella</i>         | biter        | 2.54       | 0.0225        |
| Otu00797                 | <i>Clostidiales_ucl</i>                           | biter        | 2.52       | 0.0404        |
| Otu01506                 | <i>Bacteroidale_ucl</i>                           | biter        | 2.50       | 0.0404        |
| Otu01628                 | <i>B.Btes.Bdia.Bles.Prceae.Prevotella</i>         | biter        | 2.49       | 0.0404        |
| Otu00002                 | <i>B.F.Bacilli.Lactles.Lactceae.Lactobacillus</i> | N. control   | 4.51       | 0.0016        |

|          |                                                      |            |      |        |
|----------|------------------------------------------------------|------------|------|--------|
| Otu00016 | <i>B.F.C.Cles.Lachno.Cellulosilyticum</i>            | N. control | 3.94 | 0.0056 |
| Otu00037 | <i>B.Btes.Bdia.Bles.Prceae.Prevotella</i>            | N. control | 3.42 | 0.0163 |
| Otu00142 | <i>Actinobacterium_uclid</i>                         | N. control | 3.17 | 0.0193 |
| Otu00164 | <i>Ruminococcaceae_uclid</i>                         | N. control | 3.02 | 0.0163 |
| Otu00132 | <i>B.F.C.Cles.Peptococcaceae_1.Peptococcus</i>       | N. control | 2.86 | 0.0488 |
| Otu01257 | <i>B.F.C.Cles.Ruminoc.Ruminococcaceae_uclid</i>      | N. control | 2.77 | 0.0254 |
| Otu00245 | <i>B.Btes.Bdia.Bles.Prceae.Prevotella</i>            | N. control | 2.76 | 0.0422 |
| Otu01360 | <i>B.F.C.Clostridiales_uclid</i>                     | N. control | 2.76 | 0.0105 |
| Otu01975 | <i>B.F.C.Cles.Lachno.Dorea</i>                       | N. control | 2.76 | 0.0254 |
| Otu01968 | <i>Porphyromonadaceae_uclid</i>                      | N. control | 2.73 | 0.0254 |
| Otu00267 | <i>B.Btes.Bdia.Bles.Prceae.Paraprevotella</i>        | N. control | 2.71 | 0.0362 |
| Otu02401 | <i>Ruminococcaceae_uclid</i>                         | N. control | 2.70 | 0.0254 |
| Otu01725 | <i>B.Btes.Bdia.Bles.Prceae.Prevotella</i>            | N. control | 2.62 | 0.0141 |
| Otu00258 | <i>B.Oxalobacteraceae_uclid</i>                      | N. control | 2.61 | 0.0080 |
| Otu00241 | <i>B.Prote.Gprot.Aerles.Suceae.Succinivibrio</i>     | N. control | 2.61 | 0.0312 |
| Otu00181 | <i>B.Spiro.Spirotia.Spiroles.Spiroceae.Treponema</i> | N. control | 2.58 | 0.0116 |
| Otu00175 | <i>B.F.C.Cles.Lachno.Pseudobutyrvibrio</i>           | N. control | 2.54 | 0.0163 |
| Otu00159 | <i>B.F.C.Cles.Ruminoc.Oscillibacter</i>              | N. control | 2.54 | 0.0488 |

**Table S2. Genera and OTUs associated with the biter pig group compared to the negative control pig group at t1.**

| <b>GENERA</b>       | <b>Taxonomy</b>                               | <b>Group</b> | <b>LDA</b> | <b>pValue</b> |
|---------------------|-----------------------------------------------|--------------|------------|---------------|
| <i>Roseburia</i>    | <i>B.F.C.Cles.Lachnospiraceae</i>             | N. control   | 3.23       | 0.0422        |
| <i>Anaeroplasma</i> | <i>Anaeroplasmataceae.Anaeroplasma</i>        | N. control   | 2.91       | 0.0422        |
|                     |                                               |              |            |               |
| <b>OTUs</b>         | <b>Taxonomy</b>                               | <b>Group</b> | <b>LDA</b> | <b>pValue</b> |
| Otu00051            | <i>B.F.C.Cles.Lachnospiraceae_ucl</i>         | N. control   | 3.46       | 0.0193        |
| Otu00075            | <i>B.Btes.Bdia.Bacteroidales_ucl</i>          | N. control   | 3.39       | 0.0004        |
| Otu00035            | <i>B.F.C.Clostridiales_ucl</i>                | N. control   | 3.23       | 0.0422        |
| Otu00114            | <i>B.F.C.Cles.Lachnospiraceae_ucl</i>         | N. control   | 2.89       | 0.0312        |
| Otu00093            | <i>B.Bacteroidetes_ucl</i>                    | N. control   | 2.79       | 0.0116        |
| Otu00149            | <i>B.F.C.Clostridiales_ucl</i>                | N. control   | 2.69       | 0.0266        |
| Otu00160            | <i>B.F.C.Cles.Ruminococcaceae_ucl</i>         | N. control   | 2.64       | 0.0193        |
| Otu00267            | <i>B.Btes.Bdia.Bles.Prceae.Paraprevotella</i> | N. control   | 2.64       | 0.0422        |
| Otu00210            | <i>B.Btes.Bdia.Bles.Porphyrmonadaceae_ucl</i> | N. control   | 2.50       | 0.0267        |

**Table S3. Genera and OTUs associated with the bitten pig group compared to the negative control pig group at t0.**

| <b>GENERA</b>         | <b>Taxonomy</b>                                           | <b>Group</b> | <b>LDA</b> | <b>pValue</b> |
|-----------------------|-----------------------------------------------------------|--------------|------------|---------------|
| <i>Sphaerochaeta</i>  | <i>B.Spt.Sptia.Sptales.Sptceae</i>                        | bitten       | 3.21       | 0.0056        |
| <i>Blautia</i>        | <i>B.F.C.Cles.Lachnospiraceae</i>                         | bitten       | 2.96       | 0.0312        |
| <i>Lactobacillus</i>  | <i>B.F.Bacilli.Lactobacillales.Lactobacillaceae</i>       | N. control   | 4.57       | 0.0068        |
| <i>Intestinimonas</i> | <i>B.F.C.Cles.Ruminoc</i>                                 | N. control   | 3.38       | 0.0363        |
|                       |                                                           |              |            |               |
| <b>OTUs</b>           | <b>Taxonomy</b>                                           | <b>Group</b> | <b>LDA</b> | <b>pValue</b> |
| Otu00010              | <i>B.F.Nega.Sel8moles.Ac.Phascolarctobacterium</i>        | bitten       | 3.61       | 0.0487        |
| Otu00027              | <i>B.Btes.Btes_uclid.Btes_uclid.Btes_uclid.Btes_uclid</i> | bitten       | 3.26       | 0.0138        |
| Otu00104              | <i>B.Btes.Bdia.Bles.Bles_uclid.Bles_uclid</i>             | bitten       | 3.18       | 0.0068        |
| Otu01288              | <i>B.F.C.Cles.Ruminoc.Faecalibacterium</i>                | bitten       | 3.17       | 0.0405        |
| Otu00174              | <i>B.Spt.Sptia.Sptales.Sptceae.Sphaerochaeta</i>          | bitten       | 3.16       | 0.0423        |
| Otu01451              | <i>B.Btes.Bdia.Bles.Porphy.Parabacteroides</i>            | bitten       | 2.90       | 0.0191        |
| Otu00069              | <i>B.F.F_uclid.F_uclid.F_uclid.F_uclid</i>                | bitten       | 2.87       | 0.0068        |
| Otu01334              | <i>B.ActinoB.ActinoB.CorioBles.CorioBceae.uclid</i>       | bitten       | 2.85       | 0.0405        |
| Otu00128              | <i>B.F.C.Cles.Lachnospiraceae.Blautia</i>                 | bitten       | 2.71       | 0.0267        |
| Otu00950              | <i>B.Btes.Bdia.Bles.prevceae.Alloprevotella</i>           | bitten       | 2.70       | 0.0405        |
| Otu00152              | <i>B.Btes.Bdia.Bles.prevceae.Prevotella</i>               | bitten       | 2.69       | 0.0132        |
| Otu00169              | <i>B.F.C.Cles.Cles_uclid.Cles_uclid</i>                   | bitten       | 2.69       | 0.0228        |
| Otu00950              | <i>B.Btes.Bdia.Bles.prevceae.Alloprevotella</i>           | bitten       | 2.67       | 0.0405        |
| Otu01231              | <i>B.F.C.Cles.Ruminoc.Ruminoc_uclid</i>                   | bitten       | 2.62       | 0.0405        |
| Otu01557              | <i>B.F.C.Cles.Lachnospiraceae.uclid</i>                   | bitten       | 2.55       | 0.0405        |
| Otu00182              | <i>B.F.C.Cles.Cles_uclid.Cles_uclid</i>                   | bitten       | 2.52       | 0.0228        |
| Otu00266              | <i>B.F.C.Cles.Lachnospiraceae.Blautia</i>                 | bitten       | 2.52       | 0.0228        |
| Otu00002              | <i>B.F.Bacilli.Lactles.Lactceae.Lactobacillus</i>         | N. control   | 4.58       | 0.0031        |
| Otu00016              | <i>B.Btes.Bdia.Bles.Bles_uclid.Bles_uclid</i>             | N. control   | 4.03       | 0.0011        |
| Otu00054              | <i>B.Btes.Bdia.Bles.prevceae.Prevotella</i>               | N. control   | 3.59       | 0.0423        |
| Otu00090              | <i>B.F.C.Cles.Ruminoc.Intestinimonas</i>                  | N. control   | 3.38       | 0.0192        |
| Otu01257              | <i>B.F.C.Cles.Ruminoc.Ruminoc_uclid</i>                   | N. control   | 2.62       | 0.0254        |
| Otu00181              | <i>B.Spt.Sptia.Sptales.Sptceae.Treponema</i>              | N. control   | 2.59       | 0.0116        |
| Otu01725              | <i>B.Btes.Bdia.Bles.prevceae.Prevotella</i>               | N. control   | 2.59       | 0.0359        |
| Otu00258              | <i>B.ProteoB.BetaproteoB.Burkles.Oxalo. uclid</i>         | N. control   | 2.55       | 0.0228        |
| Otu01975              | <i>B.F.C.Cles.Lachnospiraceae.Dorea</i>                   | N. control   | 2.51       | 0.0254        |



**Table S4. Genus and OTUs associated with the bitten pig group compared to the negative control pig group at t1.**

| <b>GENUS</b>     | <b>Taxonomy</b>                                             | <b>Group</b> | <b>LDA</b> | <b>pValue</b> |
|------------------|-------------------------------------------------------------|--------------|------------|---------------|
| <i>Alistipes</i> | <i>B.Btes.Bdia.Bles.Rikenellaceae</i>                       | bitten       | 2.91       | 0.036         |
|                  |                                                             |              |            |               |
| <b>OTUs</b>      | <b>Taxonomy</b>                                             | <b>Group</b> | <b>LDA</b> | <b>pValue</b> |
| Otu00021         | <i>B.Btes.Bdia.Bles.Prevotellaceae.Prevotella</i>           | bitten       | 3.52       | 0.019         |
| Otu00174         | <i>B.Sptes.Sptia.Sples.Spceae.Sphaerochaeta</i>             | bitten       | 3.01       | 0.042         |
| Otu00029         | <i>B.Btes.Bdia.Bles.Prevotellaceae.Prevotella</i>           | bitten       | 2.95       | 0.042         |
| Otu00157         | <i>B.F.C.Cles.Cles_uclid.Cles_uclid</i>                     | bitten       | 2.78       | 0.019         |
| Otu00200         | <i>B.Bacteroidetes_uclid</i>                                | bitten       | 2.53       | 0.036         |
| Otu00001         | <i>B.Btes.Bdia.Bles.Prevotellaceae.Prevotella</i>           | N. control   | 3.90       | 0.022         |
| Otu00054         | <i>B.Btes.Bdia.Bles.Prevotellaceae.Prevotella</i>           | N. control   | 3.37       | 0.011         |
| Otu00121         | <i>B.Btes.Bdia.Bles.Prevotellaceae.Prevotellaceae_uclid</i> | N. control   | 2.82       | 0.036         |
| Otu00231         | <i>B.Btes.Bdia.Bles.Porphyceae.Porphy_uclid</i>             | N. control   | 2.55       | 0.013         |
| Otu00189         | <i>B.F.C.Cles.Ruminoc.Ruminococcaceae_uclid</i>             | N. control   | 2.51       | 0.036         |

**Abbreviations for Tables S1-S4:**

*B: Bacteria; Btes: Bacteroidetes; Bdia: Bacteroidia; Bles: Bacteroidales; F: Firmicute; C: Clostridia; Cles: Clostridiales; Ruminoc: Ruminococcaceae ; Nega: Negativicutes; Spt: Spirochaetes; Sptia: Spirochaetia; Sptales: Spirochaetales; Sptceae: Spirochaetaceae; Lachno: Lachnospiraceae; Proteob: Proteobacteria; Betaph: Betaproteobacteria; Burkles: Burkholderiales; Oxal: Oxalobacteraceae; prevceae: Prevotellaceae; Ac: acidaminococcaceae; Porphy: Porphyromonadaceae; uclid: unclassified; N. control: Negative control; LDA: Linear Discriminant Analysis; t0: time of pig group selection; t1: four weeks following selection.*
